# Supplementary material
Source: PubMed Central journal article supplement (PMC6124435)
Supplement: jciinsight-3-98202-s077.pdf [file jciinsight-3-98202-s077.pdf]

**Table S1. Transcriptional changes 1 day after HD-GFP injection**

Genes with the most significant changes in expression levels were sorted by SAM and ANOVA at 24 h postinjection in the right and left side in the frontal cortex, the striatum and the mesencephalon. RStr: right striatum; LStr: Left striatum; Ctrl: Control; FC: Fold change; RCx: right cortex; LCx:left cortex; RMes: right mesencephalon; LMes: left mesencephalon.

**Striatum**

| Affymetrix Probesets | Gene symbol     | Gene name                                                                                          | SAM q-value (FDR %) | ANOVA p-value | Mean Ctrl Str $\pm$ SD | Mean $\pm$ SD RStr | Mean $\pm$ SD LStr | FC RStr/Ctrl | FC LStr/Ctrl | FC RStr/LStr |
|----------------------|-----------------|----------------------------------------------------------------------------------------------------|---------------------|---------------|------------------------|--------------------|--------------------|--------------|--------------|--------------|
| 206281_at            | <b>ADCYAP1</b>  | adenylate cyclase activating polypeptide 1 (pituitary)                                             | 52.94               | 0.05          | 406 $\pm$ 43           | 356 $\pm$ 74       | 306 $\pm$ 88       | -1.14        | -1.33        | 1.16         |
| 201196_s_at          | <b>AMD1</b>     | adenosylmethionine decarboxylase 1                                                                 | 52.94               | 0.05          | 396 $\pm$ 47           | 474 $\pm$ 95       | 378 $\pm$ 51       | 1.20         | -1.05        | 1.25         |
| 232120_at            | <b>EGFR</b>     | Epidermal growth factor receptor (erythroblastic leukemia viral (v-erb-b) oncogene homolog, avian) | 52.94               | 0.005         | 19 $\pm$ 9             | 58 $\pm$ 23        | 57 $\pm$ 52        | 3.01         | 2.97         | 1.01         |
| 231930_at            | <b>ELMOD1</b>   | ELMO domain containing 1                                                                           | 42.86               | 0.003         | 1238 $\pm$ 199         | 1802 $\pm$ 186     | 1675 $\pm$ 170     | 1.46         | 1.35         | 1.08         |
| 1555945_s_at         | <b>FAM120A</b>  | chromosome 9 open reading frame 10                                                                 | 0.00                | 0.009         | 1016 $\pm$ 48          | 1262 $\pm$ 93      | 990 $\pm$ 141      | 1.24         | -1.03        | 1.28         |
| 213552_at            | <b>GLCE</b>     | glucuronyl C5-epimerase                                                                            | 52.94               | 0.01          | 137 $\pm$ 28           | 201 $\pm$ 56       | 154 $\pm$ 60       | 1.47         | 1.12         | 1.31         |
| 206245_s_at          | <b>IVNS1ABP</b> | influenza virus NS1A binding protein                                                               | 0.00                | 0.05          | 1203 $\pm$ 433         | 1937 $\pm$ 153     | 1467 $\pm$ 505     | 1.61         | 1.22         | 1.32         |
| 227839_at            | <b>MBD5</b>     | methyl-CpG binding domain protein 5                                                                | 52.94               | 0.05          | 237 $\pm$ 84           | 397 $\pm$ 85       | 283 $\pm$ 33       | 1.67         | 1.19         | 1.40         |

|                     |                 |                                                       |       |       |            |            |            |       |        |       |
|---------------------|-----------------|-------------------------------------------------------|-------|-------|------------|------------|------------|-------|--------|-------|
| <b>231867_at</b>    | <b>ODZ2</b>     | odz, odd Oz/ten-m homolog 2 (Drosophila)              | 52.94 | 0.002 | 3612 ± 668 | 2885 ± 233 | 2658 ± 326 | -1.25 | -1.36  | 1.09  |
| <b>230563_at</b>    | <b>RASGEF1A</b> | RasGEF domain family, member 1A                       | 52.94 | 0.05  | 217 ± 10   | 234 ± 64   | 250 ± 59   | 1.08  | 1.15   | -1.07 |
| <b>201395_at</b>    | <b>RBM5</b>     | RNA binding motif protein 5                           | 52.94 | 0.05  | 663 ± 70   | 890 ± 272  | 738 ± 99   | 1.34  | 1.11   | 1.21  |
| <b>1553264_a_at</b> | <b>SYN1</b>     | synapsin I                                            | 42.86 | 0.003 | 515 ± 15   | 350 ± 63   | 402 ± 82   | -1.47 | -1.28  | -1.15 |
| <b>1553037_a_at</b> | <b>SYN2</b>     | synapsin II                                           | 52.94 | 0.05  | 270 ± 26   | 188.5 ± 70 | 173 ± 36   | -1.43 | -1.56  | 1.09  |
| <b>224553_s_at</b>  | <b>TNFRSF18</b> | tumor necrosis factor receptor superfamily, member 18 | 42.86 | 0.0   | 29 ± 17    | 75 ± 16    | 46 ± 44    | 2.60  | 1.60   | 1.62  |
| <b>205883_at</b>    | <b>ZBTB16</b>   | zinc finger and BTB domain containing 16              | 0.00  | 0.0   | 2022 ± 329 | 1062 ± 342 | 993 ± 461  | -1.90 | -2.04  | 1.07  |
| <b>222227_at</b>    | <b>ZNF236</b>   | Zinc finger protein 236                               | 52.94 | 0.0   | 40 ± 14    | 87 ± 33    | 19.8 ± 13  | 2.15  | -2.046 | 4.39  |
| <b>212893_at</b>    | <b>ZZZ3</b>     | zinc finger, ZZ domain containing 3                   | 42.86 | 0.0   | 306 ± 49   | 393 ± 58   | 438 ± 112  | 1.28  | 1.42   | -1.11 |

### Frontal cortex

| <b>Affymetrix Probesets</b> | <b>Gene symbol</b> | Gene name                                              | SAM q-value (FDR %) | ANOVA p-value | Mean ± SD Ctrl | Mean ± SD RCx | Mean ± SD LCx | FC RCx/Ctrl | FC 24h LCx/Ctrl | FC RCx/LCx |
|-----------------------------|--------------------|--------------------------------------------------------|---------------------|---------------|----------------|---------------|---------------|-------------|-----------------|------------|
| <b>202157_s_at</b>          | <b>CELF2</b>       | CUG triplet repeat, RNA binding protein 2              | 18.65               | 0.005         | 6578 ± 433     | 7585 ± 655    | 7289 ± 1559   | 1.15        | 1.11            | 1.04       |
| <b>202570_s_at</b>          | <b>DLGAP4</b>      | discs, large (Drosophila) homolog-associated protein 4 | 15.54               | 0.004         | 231 ± 42       | 326 ± 96      | 343 ± 39      | 1.41        | 1.48            | -1.05      |
| <b>201637_s_at</b>          | <b>FXR1</b>        | fragile X mental retardation, autosomal homolog 1      | 15.54               | 0.001         | 1330 ± 197     | 1749 ± 149    | 1762 ± 463    | 1.31        | 1.32            | -1.01      |

|             |                 |                                                  |       |       |              |              |              |       |       |       |
|-------------|-----------------|--------------------------------------------------|-------|-------|--------------|--------------|--------------|-------|-------|-------|
| 206730_at   | <b>GRIA3</b>    | glutamate receptor, ionotropic, AMPA 3           | 15.54 | 0.006 | 5565 ± 1020  | 8139 ± 627   | 6975 ± 1346  | 1.46  | 1.25  | 1.17  |
| 211969_at   | <b>HSP90AA1</b> | heat shock 90kDa protein 1, alpha                | 14.72 | 0.001 | 30302 ± 3685 | 32969 ± 1029 | 29686 ± 2868 | 1.09  | -1.02 | 1.11  |
| 208930_s_at | <b>ILF3</b>     | interleukin enhancer binding factor 3, 90kDa     | 15.54 | 0.0   | 210 ± 40     | 347 ± 53     | 373 ± 36     | 1.65  | 1.78  | -1.08 |
| 214577_at   | <b>MAP1B</b>    | microtubule-associated protein 1B                | 15.54 | 0.0   | 12826 ± 2776 | 11186 ± 2646 | 12482 ± 3907 | -1.15 | -1.03 | -1.12 |
| 215354_s_at | <b>PELP1</b>    | proline-, glutamic acid-, leucine-rich protein 1 | 18.65 | 0.0   | 75 ± 33      | 136 ± 23     | 178 ± 77     | 1.81  | 2.37  | -1.31 |
| 202483_s_at | <b>RANBP1</b>   | RAN binding protein 1                            | 15.54 | 0.0   | 530 ± 70     | 409 ± 114    | 391 ± 48     | -1.30 | -1.35 | 1.047 |
| 225770_at   | <b>RSPRY1</b>   | KIAA1972 protein                                 | 15.54 | 0.002 | 171 ± 19     | 254 ± 56     | 272 ± 56     | 1.48  | 1.59  | -1.07 |
| 210968_s_at | <b>RTN4</b>     | reticulon 4                                      | 14.72 | 0.005 | 32973 ± 4245 | 36861 ± 2790 | 41704 ± 5655 | 1.12  | 1.26  | -1.13 |
| 211073_x_at | <b>RPL3</b>     | ribosomal protein L3                             | 14.72 | 0.003 | 1057 ± 139   | 1030 ± 149   | 1073 ± 146   | -1.03 | 1.02  | -1.04 |
| 208939_at   | <b>SEPHS1</b>   | selenophosphate synthetase 1                     | 15.54 | 0.0   | 376 ± 20     | 304 ± 52     | 336 ± 21     | -1.24 | -1.12 | -1.11 |
| 1316_at     | <b>THRA</b>     | thyroid hormone receptor alpha                   | 15.54 | 0.001 | 1373 ± 255   | 1662 ± 279   | 1862 ± 550   | 1.21  | 1.36  | -1.12 |
| 208942_s_at | <b>SEC62</b>    | translocation protein 1                          | 18.65 | 0.004 | 5079 ± 662   | 4028 ± 300   | 4141 ± 1514  | -1.26 | -1.23 | -1.03 |
| 228749_at   | <b>ZDBF2</b>    | KIAA1571 protein                                 | 15.54 | 0.001 | 691 ± 44     | 500 ± 119    | 490 ± 64     | -1.38 | -1.41 | 1.02  |
| 222227_at   | <b>ZNF236</b>   | Zinc finger protein 236                          | 14.72 | 0.004 | 33 ± 20      | 79 ± 56      | 61 ± 21      | 2.35  | 1.83  | 1.28  |
| 213286_at   | <b>ZFR</b>      | zinc finger RNA binding protein                  | 15.54 | 0.001 | 453 ± 193    | 632 ± 177    | 650 ± 157    | 1.39  | 1.43  | -1.03 |
| 1559048_at  | ---             | KIAA1447 protein                                 | 15.54 | 0.001 | 245 ± 12     | 239 ± 55     | 240 ± 32     | -1.03 | -1.02 | -1.01 |

## Mesencephalon

| <b>Affymetrix Probesets</b> | <b>Gene Symbol</b> | Gene Name                                                                      | SAM q-value (FDR %) | ANOVA p-value | Mean $\pm$ SD Ctrl | Mean $\pm$ SD RMes | Mean $\pm$ SD LMes | FC RMes/Ctrl | FC LMes/Ctrl | FC RMes/Lmes |
|-----------------------------|--------------------|--------------------------------------------------------------------------------|---------------------|---------------|--------------------|--------------------|--------------------|--------------|--------------|--------------|
| 243139_at                   | <b>ACTA2</b>       | Actin, alpha 2, smooth muscle, aorta                                           | 62.17               | 0.05          | 516 $\pm$ 11       | 357 $\pm$ 83       | 375 $\pm$ 131      | 1.45         | -1.38        | -1.05        |
| 214783_s_at                 | <b>ANXA11</b>      | annexin A11                                                                    | 62.17               | 0.05          | 189 $\pm$ 55       | 310 $\pm$ 92       | 263 $\pm$ 45       | 1.64         | 1.39         | 1.18         |
| 200982_s_at                 | <b>ANXA6</b>       | annexin A6                                                                     | 63.69               | 0.05          | 277 $\pm$ 23       | 224 $\pm$ 87       | 223 $\pm$ 52       | -1.24        | -1.24        | 1.00         |
| 222700_at                   | <b>ATL2</b>        | atlastin GTPase 2                                                              | 63.69               | 0.0           | 1604 $\pm$ 614     | 3555 $\pm$ 489     | 4176 $\pm$ 600     | 2.22         | 2.60         | -1.17        |
| 200837_at                   | <b>BCAP31</b>      | B-cell receptor-associated protein 31                                          | 62.17               | 0.05          | 230 $\pm$ 23       | 250 $\pm$ 107      | 180 $\pm$ 74       | 1.09         | -1.28        | 1.39         |
| 205298_s_at                 | <b>BTN2A2</b>      | butyrophilin, subfamily 2, member A2                                           | 63.69               | 0.0           | 28 $\pm$ 14        | 94 $\pm$ 11        | 80 $\pm$ 32        | 3.31         | 2.83         | 1.17         |
| 204247_s_at                 | <b>CDK5</b>        | cyclin-dependent kinase 5                                                      | 62.17               | 0.003         | 376 $\pm$ 78       | 439 $\pm$ 47       | 461 $\pm$ 72       | 1.17         | 1.23         | -1.05        |
| 216295_s_at                 | <b>CLTA</b>        | clathrin, light chain A                                                        | 63.69               | 0.05          | 2186 $\pm$ 176     | 1898 $\pm$ 223     | 2133 $\pm$ 242     | -1.15        | -1.02        | -1.12        |
| 211070_x_at                 | <b>DBI</b>         | diazepam binding inhibitor (GABA receptor modulator, acyl-CoA binding protein) | 63.69               | 0.05          | 271 $\pm$ 37       | 196 $\pm$ 61       | 157 $\pm$ 107      | -1.39        | -1.73        | 1.25         |
| 40612_at                    | <b>DOPEY1</b>      | dopey family member 1                                                          | 63.69               | 0.05          | 260 $\pm$ 41       | 156 $\pm$ 60       | 119 $\pm$ 65       | -1.67        | -2.18        | 1.31         |
| 214314_s_at                 | <b>EIF5B</b>       | eukaryotic translation initiation factor 5B                                    | 63.69               | 0.005         | 1014 $\pm$ 261     | 657 $\pm$ 114      | 678 $\pm$ 59       | -1.54        | -1.49        | -1.03        |
| 219325_s_at                 | <b>ELAC1</b>       | elaC homolog 1 (E, coli)                                                       | 63.69               | 0.0           | 43 $\pm$ 28        | 164 $\pm$ 18       | 103 $\pm$ 36       | 3.85         | 2.42         | 1.59         |
| 233924_s_at                 | <b>EXOC6</b>       | exocyst complex component 6                                                    | 63.69               | 0.05          | 61 $\pm$ 44        | 91 $\pm$ 62        | 107 $\pm$ 54       | 1.49         | 1.75         | -1.17        |
| 223035_s_at                 | <b>FARSB</b>       | phenylalanyl-tRNA synthetase, beta subunit                                     | 63.69               | 0.002         | 1119 $\pm$ 28      | 1291 $\pm$ 130     | 1486 $\pm$ 109     | 1.15         | 1.33         | -1.15        |

|              |                                         |                                                                             |       |       |                |                |                 |       |        |       |
|--------------|-----------------------------------------|-----------------------------------------------------------------------------|-------|-------|----------------|----------------|-----------------|-------|--------|-------|
| 1555471_a_at | <b>FMN2</b>                             | formin 2                                                                    | 63.69 | 0.05  | 184 ± 34       | 172 ± 76       | 125 ± 89        | -1.07 | -1.48  | 1.38  |
| 207389_at    | <b>GP1BA</b>                            | glycoprotein Ib<br>(platelet), alpha<br>polypeptide                         | 63.69 | 0.05  | 180 ± 3        | 219 ± 81       | 153 ± 20        | 1.21  | -1.180 | 1.43  |
| 209631_s_at  | <b>GPR37</b>                            | G protein-coupled<br>receptor 37<br>(endothelin receptor<br>type B-like)    | 63.69 | 0.05  | 1125 ±<br>105  | 791 ± 344      | 847 ± 145       | -1.42 | -1.33  | -1.07 |
| 220642_x_at  | <b>GPR89A  <br/>GPR89B  <br/>GPR89C</b> | G protein-coupled<br>receptor 89A,B,C                                       | 63.69 | 0.009 | 596 ± 74       | 929 ± 167      | 719 ± 134       | 1.56  | 1.21   | 1.29  |
| 204738_s_at  | <b>KRIT1</b>                            | KRIT1, ankyrin<br>repeat containing...                                      | 63.69 | 0.05  | 211 ± 18       | 239 ± 85       | 235 ± 142       | 1.13  | 1.12   | 1.02  |
| 203203_s_at  | <b>KRR1</b>                             | KRR1, small<br>subunit (SSU)<br>processoPe<br>coPponent, hoPolog<br>(yeast) | 63.69 | 0.006 | 1319 ±<br>245  | 849 ± 178      | 1180 ±<br>410   | -1.55 | -1.12  | -1.39 |
| 200915_x_at  | <b>KTN1</b>                             | kinectin 1 (kinesin<br>receptor)                                            | 62.64 | 0.05  | 9681 ±<br>1047 | 10767 ±<br>849 | 9860 ±<br>896   | 1.11  | 1.02   | 1.09  |
| 224771_at    | <b>NAV1</b>                             | neuron navigator 1                                                          | 63.69 | 0.05  | 794 ± 125      | 613 ± 112      | 500 ± 92        | -1.29 | -1.59  | 1.23  |
| 217800_s_at  | <b>NDFIP1</b>                           | Nedd4 family<br>interacting protein 1                                       | 63.69 | 0.05  | 278 ± 26       | 133 ± 61       | 192 ± 54        | -2.10 | -1.45  | -1.45 |
| 201227_s_at  | <b>NDUFB8</b>                           | NADH<br>dehydrogenase<br>(ubiquinone) 1 beta<br>subcoPplex, 8,<br>19kDa     | 63.69 | 0.05  | 7974 ±<br>961  | 7176 ±<br>801  | 7512 ±<br>1679  | -1.11 | -1.06  | -1.05 |
| 219293_s_at  | <b>OLA1</b>                             | Obg-like ATPase 1                                                           | 62.17 | 0.003 | 13429 ±<br>391 | 15238 ±<br>521 | 17995 ±<br>1334 | 1.13  | 1.34   | -1.18 |
| 200768_s_at  | <b>MAT2A</b>                            | methionine<br>adenosyltransferase<br>II, alpha                              | 63.69 | 0.0   | 9692 ±<br>1110 | 7406 ±<br>567  | 7902 ±<br>1196  | -1.31 | -1.23  | -1.07 |
| 226300_at    | <b>MED19</b>                            | mediator coPplex<br>subunit 19                                              | 63.69 | 0.0   | 520 ± 13       | 459 ± 82       | 580 ± 66        | -1.13 | 1.11   | -1.26 |
| 232676_x_at  | <b>MYEF2</b>                            | myelin expression<br>factor 2                                               | 62.17 | 0.05  | 395 ± 130      | 591 ± 131      | 502 ± 113       | 1.50  | 1.27   | 1.18  |

|              |                 |                                                                      |       |       |              |                |              |       |       |       |
|--------------|-----------------|----------------------------------------------------------------------|-------|-------|--------------|----------------|--------------|-------|-------|-------|
| 1554633_a_at | <b>MYT1L</b>    | myelin transcription factor 1-like                                   | 63.69 | 0.0   | 272 ± 37     | 143 ± 40       | 146 ± 68     | -1.90 | -1.87 | -1.02 |
| 219195_at    | <b>PPARGC1A</b> | peroxisome proliferator-activated receptor $\alpha$ 1, coactivator 1 | 63.69 | 0.05  | 835 ± 73     | 956 ± 387      | 902 ± 178    | 1.15  | 1.08  | 1.06  |
| 203317_at    | <b>PSD4</b>     | pleckstrin and Sec7 domain containing 4                              | 63.69 | 0.05  | 38 ± 20      | 90 ± 49        | 119 ± 90     | 2.36  | 3.12  | -1.33 |
| 217492_s_at  | <b>PTEN</b>     | phosphatase and tensin homolog                                       | 63.69 | 0.05  | 182 ± 13     | 222 ± 42       | 204 ± 34     | 1.22  | 1.12  | 1.09  |
| 211542_x_at  | <b>RPS10</b>    | ribosomal protein S10                                                | 62.17 | 0.05  | 11058 ± 1491 | 9033 ± 3174    | 11127 ± 1880 | -1.22 | 1.01  | -1.23 |
| 201140_s_at  | <b>RAB5C</b>    | RAB5C, member RAS oncogene family                                    | 62.17 | 0.05  | 725 ± 93     | 610 ± 74       | 539 ± 100    | -1.19 | -1.34 | 1.13  |
| 202507_s_at  | <b>SNAP25</b>   | synaptosomal-associated protein, 25kDa                               | 62.17 | 0.05  | 6696 ± 742   | 10575 ± 3219   | 13170 ± 2756 | 1.58  | 1.97  | -1.25 |
| 227649_s_at  | <b>SRGAP2</b>   | SLIT-ROBO Rho GTPase activating protein 2                            | 62.17 | 0.001 | 288 ± 54     | 313 ± 21       | 236 ± 29     | 1.09  | -1.22 | 1.33  |
| 202688_at    | <b>TNFSF10</b>  | tumor necrosis factor (ligand) superfamily, member 10                | 62.17 | 0.001 | 5 ± 3        | 63 ± 17        | 59 ± 19      | 11.53 | 10.96 | 1.05  |
| 212284_x_at  | <b>TPT1</b>     | tumor protein, translationally-controlled 1                          | 62.17 | 0.05  | 28931 ± 1996 | 24101.1 ± 2585 | 24650 ± 3776 | -1.20 | -1.17 | -1.02 |
| 221506_s_at  | <b>TNPO2</b>    | transportin                                                          | 62.17 | 0.05  | 88 ± 29      | 126 ± 41       | 71 ± 14      | 1.43  | -1.24 | 1.78  |
| 201683_x_at  | <b>TOX4</b>     | TOX high mobility group box family member 4                          | 63.69 | 0.01  | 940 ± 79     | 919 ± 170      | 892 ± 186    | -1.02 | -1.05 | 1.03  |
| 228988_at    | <b>ZNF711</b>   | zinc finger protein 711                                              | 62.17 | 0.0   | 2799 ± 221   | 1473 ± 332     | 2167 ± 767   | -1.90 | -1.29 | -1.47 |

**Table S2. Evolution of transcriptional changes from 1 day to 28 days postinjection by HD-GFP**

Genes with the most significant changes in expression sorted by SAM and ANOVA at 1 and 28 days postinjection in the right striatum, in the right frontal cortex and in the right midbrain. RStr: right striatum; LStr: left striatum; Ctrl: control; FC: fold change; RCx: right cortex; LCx: left cortex; RMes: right midbrain; LMes: left midbrain.

**Right striatum**

| Probesets   | Gene Symbol                         | Gene Name                                                                                  | SAM q-value (FDR %) | ANOVA p-value | Mean $\pm$ SD Ctrl Str | Mean $\pm$ SD 24h RStr | Mean $\pm$ SD 28d RStr | FC 24h/Ctrl | FC 28d/Ctrl |
|-------------|-------------------------------------|--------------------------------------------------------------------------------------------|---------------------|---------------|------------------------|------------------------|------------------------|-------------|-------------|
| 231045_x_at | <i>C11orf31</i>                     | chromosome 11 open reading frame 31                                                        | 9.48                | 0.001         | 68 $\pm$ 13            | 786 $\pm$ 93           | 480 $\pm$ 81           | 1.15        | -1.42       |
| 203166_at   | <i>CFDP1</i>                        | craniofacial development protein 1                                                         | 0.0                 | 0.001         | 1858 $\pm$ 443         | 3689 $\pm$ 255         | 1538 $\pm$ 461         | 1.99        | -1.21       |
| 201842_s_at | <i>EFEMP1</i>                       | EGF-containing fibulin-like extracellular matrix protein 1                                 | 0.0                 | 0.004         | 1485 $\pm$ 295         | 3737 $\pm$ 852         | 1405 $\pm$ 470         | 2.52        | -1.06       |
| 209356_x_at | <i>EFEMP2</i>                       | EGF-containing fibulin-like extracellular matrix protein 2                                 | 0.0                 | 0.0           | 178 $\pm$ 9            | 280 $\pm$ 11           | 141 $\pm$ 26           | 1.57        | -1.26       |
| 213502_x_at | <i>GUSBP11</i>                      | -----                                                                                      | 0.0                 | 0.005         | 30 $\pm$ 15            | 310 $\pm$ 94           | 35 $\pm$ 28            | 10.37       | 1.18        |
| 212671_s_at | <i>HLA-DQA1</i> /// <i>HLA-DQA2</i> | MHC, class II, DQ $\alpha$ 1 /// major histocompatibility complex, class II, DQ $\alpha$ 2 | 5.30                | 0.002         | 25 $\pm$ 20.11         | 230 $\pm$ 86           | 10 $\pm$ 5             | 9.35        | -2.56       |
| 211654_x_at | <i>HLA-DQB1</i>                     | major histocompatibility complex, class II, DQ beta 1                                      | 0.0                 | 0.005         | 464 $\pm$ 150          | 1071 $\pm$ 166         | 433 $\pm$ 110          | 2.30        | -1.07       |
| 208306_x_at | <i>HLA-DRB1</i>                     | Major histocompatibility complex, class II, DR beta 1                                      | 0.0                 | 0.0           | 523 $\pm$ 115          | 797 $\pm$ 21           | 346 $\pm$ 106          | 1.52        | -1.51       |
| 211529_x_at | <i>HLA-G</i>                        | HLA-G histocompatibility antigen, class I, G                                               | 0.0                 | 0.005         | 1200 $\pm$ 562         | 4555 $\pm$ 755         | 1431 $\pm$ 328         | 3.79        | 1.19        |
| 200943_at   | <i>HMGN1</i>                        | high-mobility group nucleosome binding                                                     | 9.01                | 0.003         | 532 $\pm$ 35           | 873 $\pm$ 87           | 660 $\pm$ 105          | 1.64        | 1.24        |

domain 1

|              |                 |                                                            |      |       |            |            |            |       |       |
|--------------|-----------------|------------------------------------------------------------|------|-------|------------|------------|------------|-------|-------|
| 211641_x_at  | <b>IGHM</b>     | Immunoglobulin heavy constant gamma 1                      | 0.0  | 0.006 | 109 ± 53   | 318 ± 62   | 99 ± 24    | 2.92  | -1.11 |
| 215946_x_at  | <b>IGLL3P</b>   | immunoglobulin lambda-like polypeptide 1                   | 9.48 | 0.004 | 114 ± 70   | 344 ± 75   | 107 ± 27   | 3.01  | -1.07 |
| 215379_x_at  | <b>IGLV1-44</b> | -----                                                      | 0.0  | 0.005 | 20 ± 21    | 957 ± 200  | 27 ± 30    | 48.99 | 1.37  |
| 223597_at    | <b>ITLN1</b>    | intelectin 1 (galactofuranose binding)                     | 0.0  | 0.004 | 123 ± 18   | 325 ± 66   | 105 ± 48   | 2.65  | -1.17 |
| 212082_s_at  | <b>MYL6</b>     | myosin, light polypeptide 6, smooth muscle and non-muscle  | 0.0  | 0.0   | 2833 ± 732 | 4664 ± 520 | 1591 ± 783 | 1.65  | -1.78 |
| 219483_s_at  | <b>PORCN</b>    | porcupine homolog (Drosophila)                             | 6.43 | 0.0   | 476 ± 25   | 414 ± 39   | 251 ± 65   | -1.15 | -1.90 |
| 205407_at    | <b>RECK</b>     | reversion-inducing-cysteine-rich protein with kazal motifs | 0.0  | 0.0   | 22 ± 15    | 90 ± 18    | 132 ± 8    | 4.02  | 5.89  |
| 1553264_a_at | <b>SYN1</b>     | synapsin I                                                 | 5.30 | 0.003 | 515 ± 15   | 350 ± 63   | 334 ± 25   | -1.47 | -1.54 |
| 205883_at    | <b>ZBTB16</b>   | zinc finger and BTB domain containing 16                   | 0.0  | 0.0   | 2022 ± 329 | 1062 ± 342 | 666 ± 188  | -1.90 | -3.03 |

### Right frontal cortex

| Probsets    | Gene Symbol   | Gene Name                                              | SAM q-value (FDR %) | ANOVA p-value | Mean ± SD Ctrl Cx | Mean ± SD 24h_RCx | Mean ± SD 28d_RCx | FC 24h/Ctrl | FC 28d/Ctrl |
|-------------|---------------|--------------------------------------------------------|---------------------|---------------|-------------------|-------------------|-------------------|-------------|-------------|
| 202157_s_at | <b>CELF2</b>  | CUG triplet repeat, RNA binding protein 2              | 18.65               | 0.005         | 6578 ± 433        | 7585 ± 655        | 9527 ± 1447       | 1.15        | 1.45        |
| 202570_s_at | <b>DLGAP4</b> | discs, large (Drosophila) homolog-associated protein 4 | 15.54               | 0.004         | 231 ± 43          | 326 ± 96          | 509 ± 97          | 1.41        | 2.20        |
| 201693_s_at | <b>EGR1</b>   | early growth response 1                                | 15.54               | 0.0           | 602 ± 41          | 373 ± 52          | 351 ± 20          | -1.61       | -1.72       |
| 201637_s_at | <b>FXR1</b>   | fragile X mental retardation, autosomal homolog 1      | 15.54               | 0.001         | 1330 ± 198        | 1749 ± 149        | 2056 ± 174        | 1.31        | 1.55        |
| 206730_at   | <b>GRIA3</b>  | glutamate receptor, ionotropic, AMPA 3                 | 15.54               | 0.006         | 5565 ± 1020       | 8139 ± 627        | 9483 ± 719        | 1.46        | 1.70        |



|             |                 |                                                  |       |       |              |              |                  |       |       |
|-------------|-----------------|--------------------------------------------------|-------|-------|--------------|--------------|------------------|-------|-------|
| 211969_at   | <b>HSP90AA1</b> | heat shock 90kDa protein 1, alpha                | 14.72 | 0.001 | 30302 ± 3685 | 32969 ± 1029 | 36779 ± 941      | 1.09  | 1.21  |
| 208930_s_at | <b>ILF3</b>     | interleukin enhancer binding factor 3, 90kDa     | 15.54 | 0.0   | 210 ± 40     | 347 ± 53     | 755 ± 196        | 1.65  | 3.60  |
| 1559048_at  | ---             | KIAA1447 protein                                 | 15.54 | 0.001 | 245 ± 12     | 238 ± 55     | 167 ± 23         | -1.03 | -1.47 |
| 214577_at   | <b>MAP1B</b>    | microtubule-associated protein 1B                | 15.54 | 0.0   | 12826 ± 2776 | 11186 ± 2646 | 8624 ± 2552      | -1.15 | -1.49 |
| 218330_s_at | <b>NAV2</b>     | neuron navigator 2                               | 15.54 | 0.0   | 1682 ± 89    | 2671 ± 457   | 1798 ± 178       | 1,59  | 1,07  |
| 215354_s_at | <b>PELP1</b>    | proline-, glutamic acid-, leucine-rich protein 1 | 18.65 | 0.0   | 75 ± 33      | 136 ± 23     | 138 ± 39         | 1.81  | 1.83  |
| 202483_s_at | <b>RANBP1</b>   | RAN binding protein 1                            | 15.54 | 0.0   | 529 ± 70     | 409 ± 114    | 329 ± 54         | -1.30 | -1.61 |
| 225770_at   | <b>RSPRY1</b>   | KIAA1972 protein                                 | 15.54 | 0.002 | 171 ± 19     | 254 ± 56     | 289 ± 31         | 1.48  | 1.69  |
| 210968_s_at | <b>RTN4</b>     | reticulon 4                                      | 14.72 | 0.005 | 32973 ± 4245 | 36861 ± 2791 | 45440 ± 4544     | 1.12  | 1.38  |
| 211073_x_at | <b>RPL3</b>     | ribosomal protein L3                             | 14.72 | 0.003 | 1057 ± 140   | 1030 ± 149   | 656 ± 104        | -1.03 | -1.61 |
| 208939_at   | <b>SEPHS1</b>   | selenophosphate synthetase 1                     | 15.54 | 0.0   | 376 ± 20     | 304 ± 52     | 300 ± 17         | -1.24 | -1.25 |
| 1316_at     | <b>THRA</b>     | thyroid hormone receptor, alpha                  | 15.54 | 0.001 | 1373 ± 255   | 1662 ± 279   | 1579 ± 51        | 1.21  | 1.15  |
| 208942_s_at | <b>SEC62</b>    | translocation protein 1                          | 18.65 | 0.004 | 5079 ± 663   | 4028 ± 300   | 3179.13 ± 555.55 | -1.26 | -1.60 |
| 202818_s_at | <b>TCEB3</b>    | transcription elongation factor B (SIII)         | 12.82 | 0.01  | 526 ± 93     | 690 ± 64     | 986 ± 150        | 1.31  | 1.88  |
| 228749_at   | <b>ZDBF2</b>    | KIAA1571 protein                                 | 15.54 | 0.001 | 691 ± 44     | 500 ± 119    | 492 ± 52         | -1.38 | -1.40 |
| 222227_at   | <b>ZNF236</b>   | Zinc finger protein 236                          | 14.72 | 0.004 | 33 ± 20      | 79 ± 56      | 201 ± 69         | 2.35  | 6.00  |
| 213286_at   | <b>ZFR</b>      | zinc finger RNA binding protein                  | 15.54 | 0.001 | 453 ± 193    | 632 ± 177    | 1100 ± 213       | 1.39  | 2.43  |

### Right mesencephalon

| Probesets   | Gene Symbol   | Gene Name                            | SAM q-value (FDR %) | ANOVA p-value | Mean ± SD Ctrl_RMes | Mean ± SD 24h_RMes | Mean ± SD 28d_RMes | FC 24h/Ctrl_RMes | FC 28d/Ctrl_RMes |
|-------------|---------------|--------------------------------------|---------------------|---------------|---------------------|--------------------|--------------------|------------------|------------------|
| 243139_at   | <b>ACTA2</b>  | Actin, alpha 2, smooth muscle, aorta | 62.17               | 0.05          | 516 ± 111           | 356 ± 83           | 289 ± 39           | -1.45            | -1.38            |
| 214783_s_at | <b>ANXA11</b> | annexin A11                          | 62.17               | 0.05          | 189 ± 55            | 310 ± 92           | 252 ± 19           | 1.64             | 1.39             |
| 200982_s_at | <b>ANXA6</b>  | annexin A6                           | 63.69               | 0.05          | 277 ± 23            | 224 ± 88           | 200 ± 50           | -1.24            | -1.24            |

|                     |                                 |                                                                                |       |       |            |            |            |       |       |
|---------------------|---------------------------------|--------------------------------------------------------------------------------|-------|-------|------------|------------|------------|-------|-------|
| <b>222700_at</b>    | <b>ATL2</b>                     | atlastin GTPase 2                                                              | 63.69 | 0.0   | 1604 ± 614 | 3555 ± 489 | 4353 ± 590 | 2.22  | 2.60  |
| <b>200837_at</b>    | <b>BCAP31</b>                   | B-cell receptor-associated protein 31                                          | 62.17 | 0.05  | 230 ± 23   | 250 ± 107  | 241 ± 44   | 1.09  | -1.28 |
| <b>205298_s_at</b>  | <b>BTN2A2</b>                   | butyrophilin, subfamily 2, member A2                                           | 63.69 | 0.0   | 28 ± 14    | 94 ± 11    | 112 ± 21   | 3.31  | 2.83  |
| <b>202769_at</b>    | <b>CCNG2</b>                    | cyclin G2                                                                      | 63.69 | 0.0   | 32 ± 20    | 135 ± 9    | 102 ± 25   | 4.19  | 3.19  |
| <b>204247_s_at</b>  | <b>CDK5</b>                     | cyclin-dependent kinase 5                                                      | 62.17 | 0.003 | 376 ± 78   | 439 ± 47   | 591 ± 60   | 1.17  | 1.23  |
| <b>216295_s_at</b>  | <b>CLTA</b>                     | clathrin, light chain A                                                        | 63.69 | 0.05  | 2186 ± 176 | 1898 ± 223 | 2028 ± 72  | -1.15 | -1.02 |
| <b>211070_x_at</b>  | <b>DBI</b>                      | diazepam binding inhibitor (GABA receptor modulator, acyl-CoA binding protein) | 63.69 | 0.05  | 271 ± 37   | 196 ± 61   | 172 ± 47   | -1.39 | -1.73 |
| <b>40612_at</b>     | <b>DOPEY1</b>                   | dopey family member 1                                                          | 63.69 | 0.05  | 260 ± 41   | 156 ± 60   | 194 ± 38   | -1.67 | -2.18 |
| <b>214314_s_at</b>  | <b>EIF5B</b>                    | eukaryotic translation initiation factor 5B                                    | 63.69 | 0.005 | 1014 ± 261 | 657 ± 114  | 563 ± 67   | -1.54 | -1.49 |
| <b>219325_s_at</b>  | <b>ELAC1</b>                    | elaC homolog 1 (E, coli)                                                       | 63.69 | 0.0   | 43 ± 28    | 164 ± 18   | 160 ± 23   | 3.85  | 3.76  |
| <b>233924_s_at</b>  | <b>EXOC6</b>                    | exocyst complex component 6                                                    | 63.69 | 0.05  | 61 ± 44    | 91 ± 62    | 157 ± 19   | 1.49  | 1.75  |
| <b>223035_s_at</b>  | <b>FARSB</b>                    | phenylalanyl-tRNA synthetase, beta subunit                                     | 63.69 | 0.002 | 1119 ± 28  | 1291 ± 130 | 1525 ± 94  | 1.15  | 1.33  |
| <b>1555471_a_at</b> | <b>FMN2</b>                     | formin 2                                                                       | 63.69 | 0.05  | 184 ± 34   | 172 ± 76   | 128 ± 17   | -1.08 | -1.48 |
| <b>207389_at</b>    | <b>GP1BA</b>                    | glycoprotein Ib (platelet), alpha polypeptide                                  | 63.69 | 0.05  | 180 ± 3    | 219 ± 81   | 182 ± 35   | 1.21  | -1.18 |
| <b>209631_s_at</b>  | <b>GPR37</b>                    | G protein-coupled receptor 37 (endothelin receptor type B-like)                | 63.69 | 0.05  | 1125 ± 105 | 791 ± 344  | 839 ± 102  | -1.42 | -1.33 |
| <b>220642_x_at</b>  | <b>GPR89A   GPR89B   GPR89C</b> | G protein-coupled receptor 89A,B,C                                             | 63.69 | 0.009 | 596 ± 74   | 929 ± 167  | 1021 ± 133 | 1.56  | 1.21  |
| <b>231875_at</b>    | <b>KIF21A</b>                   | kinesin family member 21A                                                      | 63.69 | 0.0   | 109 ± 25   | 188 ± 10   | 139 ± 13   | 1.72  | 1.27  |
| <b>204738_s_at</b>  | <b>KRIT1</b>                    | KRIT1, ankyrin repeat containing...                                            | 63.69 | 0.05  | 211 ± 18   | 239 ± 85   | 251 ± 20   | 1.13  | 1.12  |
| <b>203203_s_at</b>  | <b>KRR1</b>                     | KRR1, small subunit (SSU) processosome component, hoPolog                      | 63.69 | 0.006 | 1319 ± 245 | 849 ± 178  | 746 ± 102  | -1.55 | -1.12 |

(yeast)

|              |                 |                                                                       |       |       |                |             |              |       |       |
|--------------|-----------------|-----------------------------------------------------------------------|-------|-------|----------------|-------------|--------------|-------|-------|
| 200915_x_at  | <b>KTN1</b>     | kinectin 1 (kinesin receptor)                                         | 62.64 | 0.05  | 9681 ± 1047    | 10767 ± 849 | 10927 ± 701  | 1.11  | 1.02  |
| 219760_at    | <b>LIN7B</b>    | lin-7 homolog B (C, elegans)                                          | 63.69 | 0.05  | 55 ± 42        | 115 ± 76    | 175 ± 25     | 2.10  | 2.82  |
| 220044_x_at  | <b>LUC7L3</b>   | LUC7-like 3 (S, cerevisiae)                                           | 63.69 | 0.05  | 797 ± 105      | 1051 ± 135  | 860 ± 34     | 1.32  | 1.27  |
| 224561_s_at  | <b>MORF4L1</b>  | Mortality factor 4 like 1                                             | 63.69 | 0.05  | 125 ± 34       | 103 ± 58    | 95 ± 20      | -1.22 | -1.43 |
| 224771_at    | <b>NAV1</b>     | neuron navigator 1                                                    | 63.69 | 0.05  | 794 ± 125      | 613 ± 112   | 664 ± 107    | -1.29 | -1.59 |
| 217800_s_at  | <b>NDFIP1</b>   | Nedd4 family interacting protein 1                                    | 63.69 | 0.05  | 278 ± 26       | 133 ± 61    | 131 ± 59     | -2.10 | -1.45 |
| 201227_s_at  | <b>NDUFB8</b>   | NADH dehydrogenase (ubiquinone) 1 beta subcoPplex, 8, 19kDa           | 63.69 | 0.05  | 7974 ± 961     | 7176 ± 801  | 6665 ± 260   | -1.11 | -1.06 |
| 219293_s_at  | <b>OLA1</b>     | Obg-like ATPase 1                                                     | 62.17 | 0.003 | 13429 ± 392    | 15238 ± 521 | 15003 ± 534  | 1.13  | 1.34  |
| 200768_s_at  | <b>MAT2A</b>    | methionine adenosyltransferase II, alpha                              | 63.69 | 0.0   | 9692 ± 1110    | 7406 ± 567  | 6538 ± 660   | -1.31 | -1.23 |
| 226300_at    | <b>MED19</b>    | mediator coPplex subunit 19                                           | 63.69 | 0.0   | 520 ± 13       | 459 ± 82    | 666 ± 42     | -1.13 | 1.11  |
| 232676_x_at  | <b>MYEF2</b>    | myelin expression factor 2                                            | 62.17 | 0.05  | 395 ± 130      | 591 ± 131   | 722 ± 101    | 1.50  | 1.27  |
| 1554633_a_at | <b>MYT1L</b>    | myelin transcription factor 1-like                                    | 63.69 | 0.0   | 272 ± 37       | 143 ± 40    | 114 ± 27     | -1.90 | -1.87 |
| 211302_s_at  | <b>PDE4B</b>    | phosphodiesterase 4B                                                  | 63.69 | 0.0   | 52.88 ± 68     | 195 ± 17    | 203 ± 36     | 3.69  | 3.85  |
| 219195_at    | <b>PPARGC1A</b> | peroxisome proliferator-activated receptor gaPPa, coactivator 1 alpha | 63.69 | 0.05  | 834.74 ± 73.47 | 956 ± 386   | 846 ± 62     | 1.15  | 1.08  |
| 203317_at    | <b>PSD4</b>     | pleckstrin and Sec7 domain containing 4                               | 63.69 | 0.05  | 38 ± 20        | 90 ± 49     | 125 ± 21     | 2.36  | 3.12  |
| 217492_s_at  | <b>PTEN</b>     | phosphatase and tensin homolog                                        | 63.69 | 0.05  | 182 ± 13       | 222 ± 42    | 205 ± 16     | 1.22  | 1.12  |
| 211542_x_at  | <b>RPS10</b>    | ribosomal protein S10                                                 | 62.17 | 0.05  | 11058 ± 1491   | 9033 ± 3174 | 12541 ± 1968 | -1.22 | 1.01  |

|             |               |                                             |       |       |            |              |              |       |       |
|-------------|---------------|---------------------------------------------|-------|-------|------------|--------------|--------------|-------|-------|
| 1564377_at  | <b>SHANK2</b> | SH3 and Multiple ankyrin repeat doPains 2   | 62.17 | 0.0   | 57 ± 6     | 41 ± 28      | 10 ± 12      | -1.41 | -5.88 |
| 202507_s_at | <b>SNAP25</b> | synaptosomal-associated protein, 25kDa      | 62.17 | 0.05  | 6696 ± 742 | 10575 ± 3218 | 12809 ± 2447 | 1.58  | 1.97  |
| 227649_s_at | <b>SRGAP2</b> | SLIT-ROBO Rho GTPase activating protein 2   | 62.17 | 0.001 | 288 ± 54   | 313 ± 21     | 419 ± 22     | 1.09  | -1.22 |
| 221506_s_at | <b>TNPO2</b>  | transportin                                 | 63.7  | 0.05  | 88 ± 29    | 126 ± 41     | 119 ± 8      | 1.43  | -1.24 |
| 201683_x_at | <b>TOX4</b>   | TOX high mobility group box family member 4 | 63.69 | 0.01  | 940 ± 80   | 919 ± 170    | 1513 ± 256   | -1.02 | -1.05 |
| 228988_at   | <b>ZNF711</b> | zinc finger protein 711                     | 62.17 | 0.0   | 2799 ± 221 | 1473 ± 333   | 1611 ± 372   | -1.90 | -1.30 |

## Transcription profiles 1 day post-injection with HD-GFP

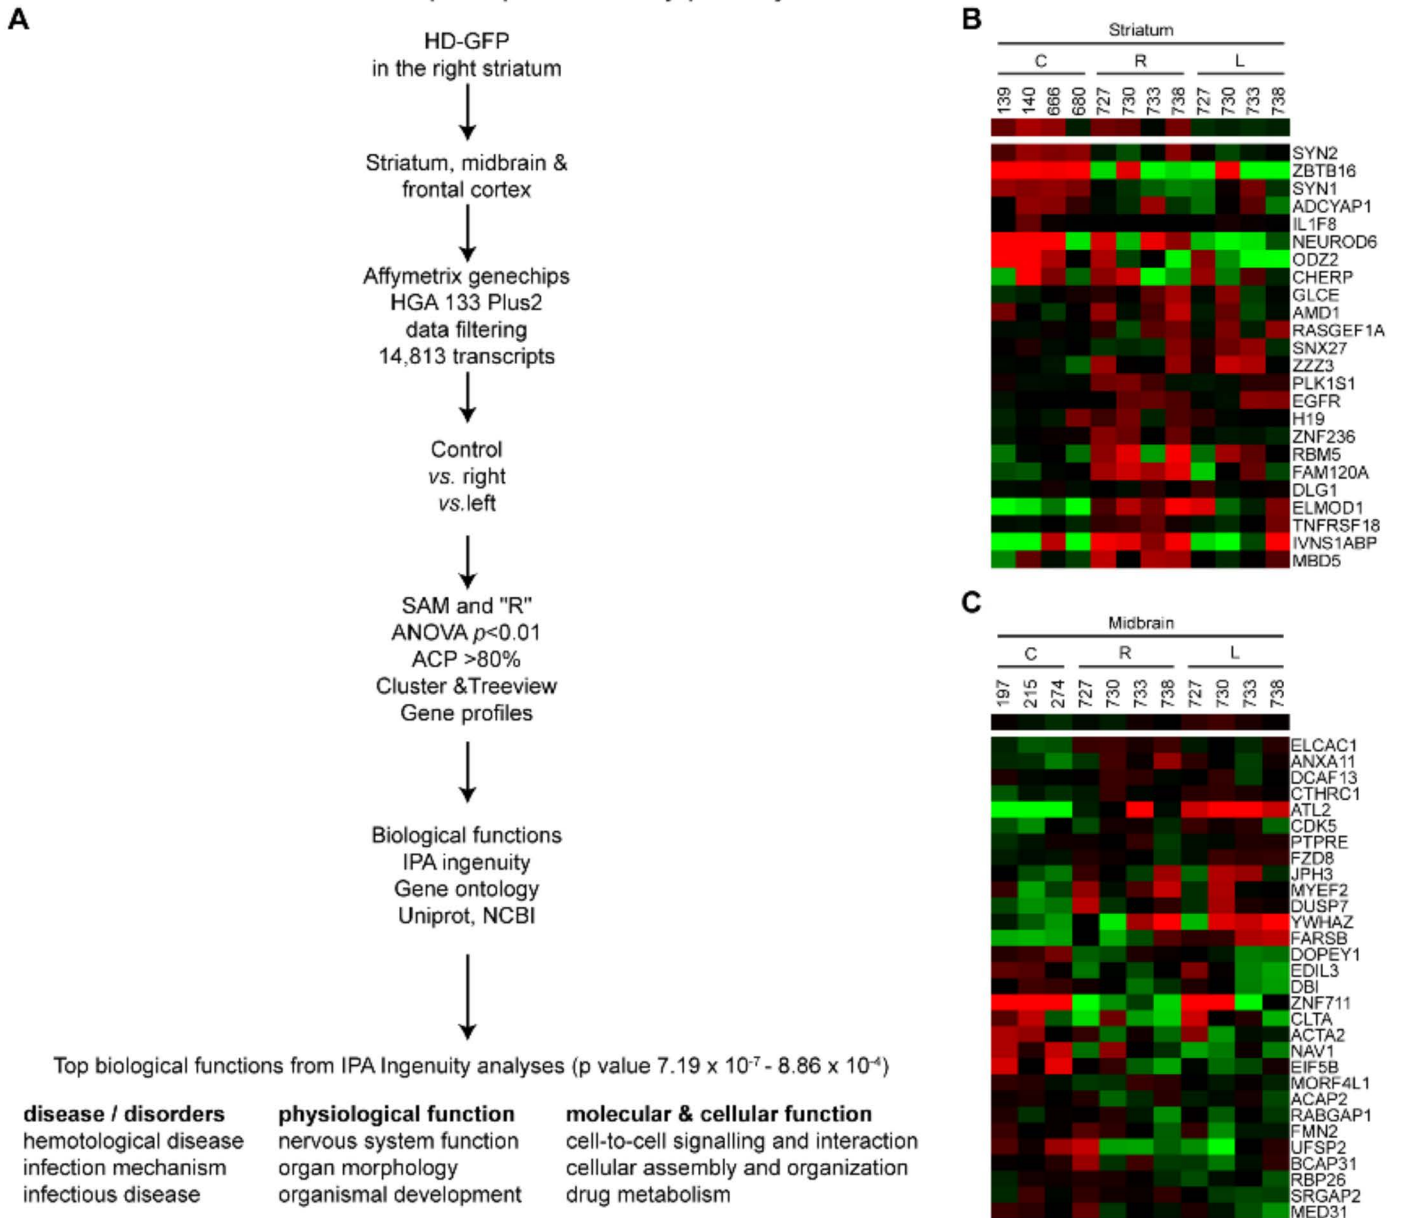

**Figure S1. Transcriptional changes following HD-GFP injection in the *M. murinus* brain at day 1**

**A.** Schematic representation of the different steps of the analyses. The microarray data of each brain sample were filtered to detect the present transcripts. Then, the transcriptional changes were sorted by SAM, ANOVA and principal component analysis (PCA) analyses. The main biological functions involved in these transcriptional changes in relation with the HD-GFP injection in the brain. **B.** Transcriptional profiles in the right striatum (R) compared to the left contralateral side (L) and to the control obtained by hierarchical. **C.** Transcriptional profiles in the midbrain. Red: up-regulated genes; green: down-regulated genes; black: no change in the gene expression; each line corresponding to a gene and each column to an animal.

**A**

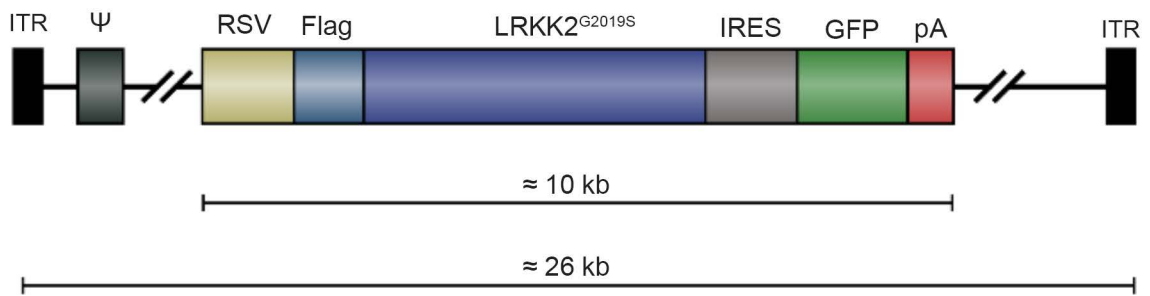

**B**

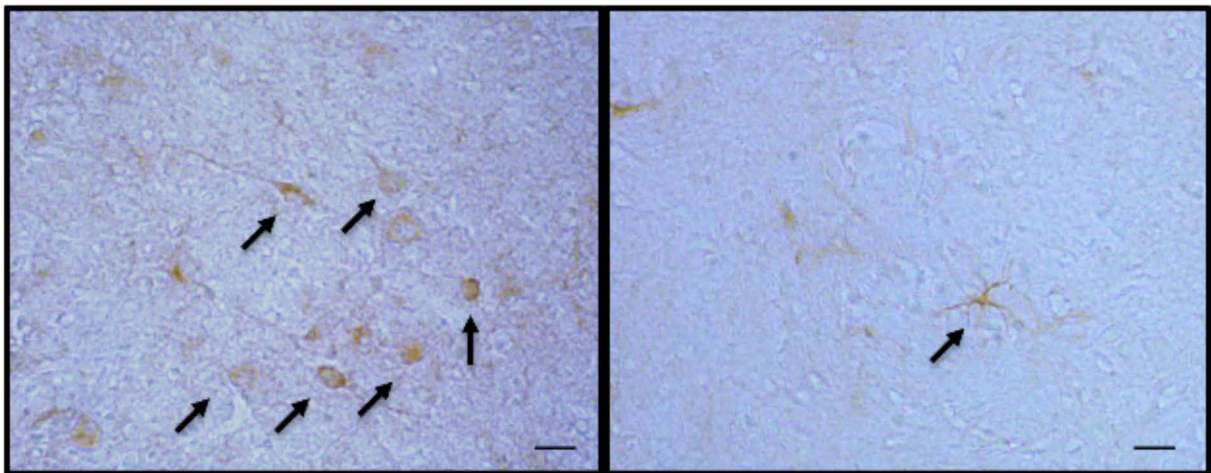

**Figure S2. Vector schema and controls for injections**

**A.** Schematic representation of the genome of the ~26 kbp HD-LRRK2<sup>G2019S</sup> vector

ITR= ~200 bp inverted terminal repeats; Ψ = ~150 bp CAV-2 packaging domain; RSV = ~700 bp Rous sarcoma virus early promoter; Flag = ~100 bp Flag Tag; LRRK2G2019S = ~7.8 kbp codon-optimized cDNA; IRES = ~500 bp internal ribosome entry site; GFP – 700 bp green fluorescent protein ORF; polyA = ~100 bp SV40 polyA signal.

**B.** LRRK2 expression in the putamen at 15 days post-injection

Black arrows indicate LRRK2-immunoreactive neurons in the injected hemisphere (left) and LRRK2 immunoreactive astrocytes in the contralateral hemisphere (right) (n = 2 animals with 3 sections per animal). Scale bar = 30 μm.



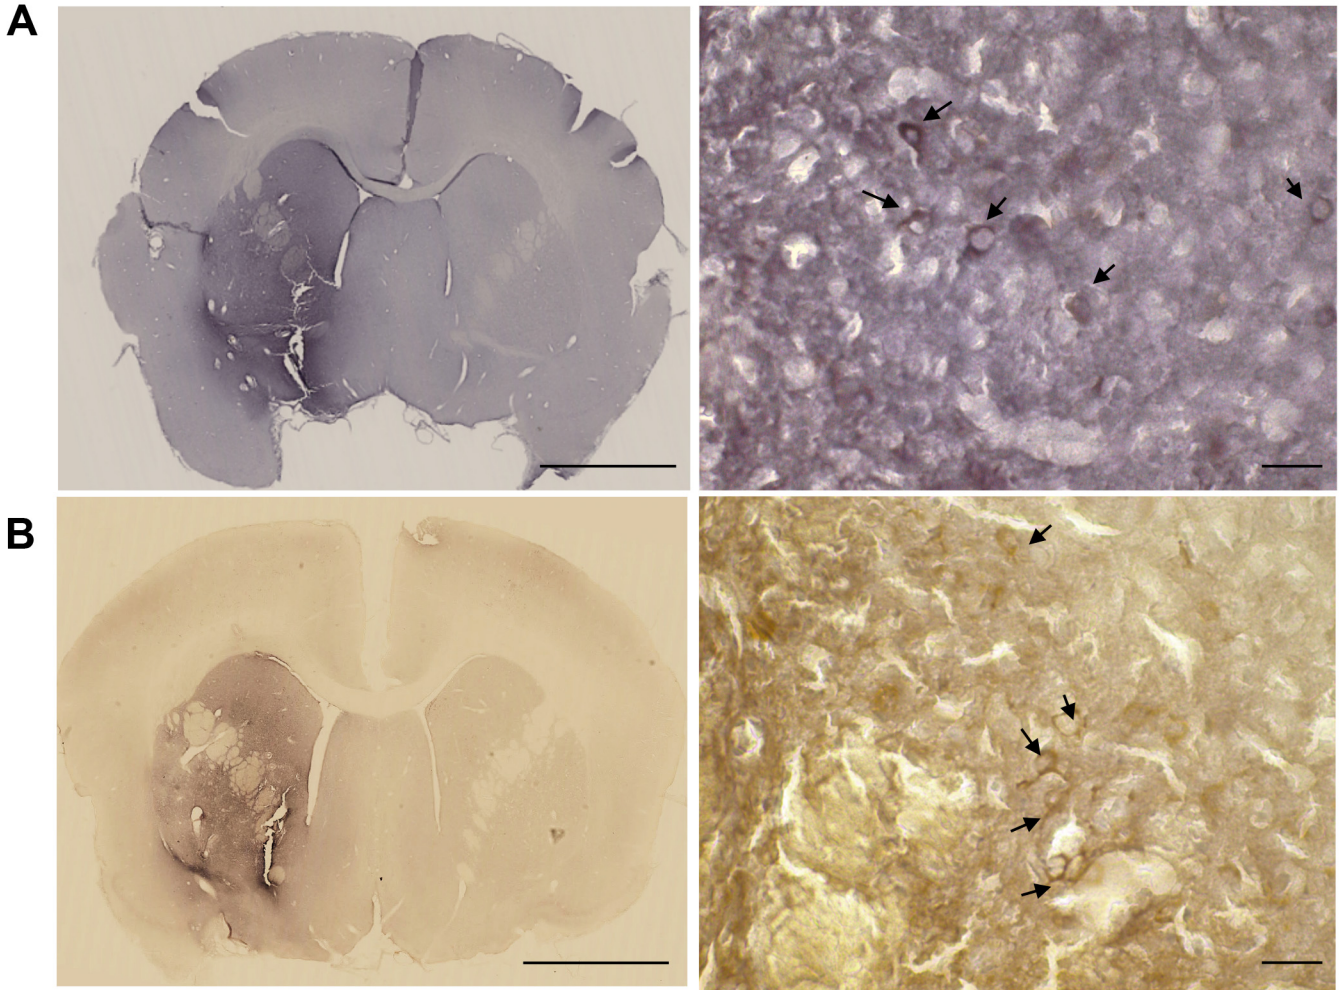

**Figure S3. Microglial activation into the striatum of the HD-LRRK2<sup>G2019S</sup>-injected mouse lemur (15 days post injection)**

As demonstrated by **A**. Iba1 (ionized calcium binding adaptor molecule 1, DAB with nickel enhancement, black) and **B**. BRCA1 (breast cancer type 1 susceptibility protein, DAB, brown) immunoreactivity (n = 2 animals with 3 sections per animal). Arrows: cells with microglia morphology. Scale bars = 3 mm top panels, 20  $\mu$ m bottom panels.

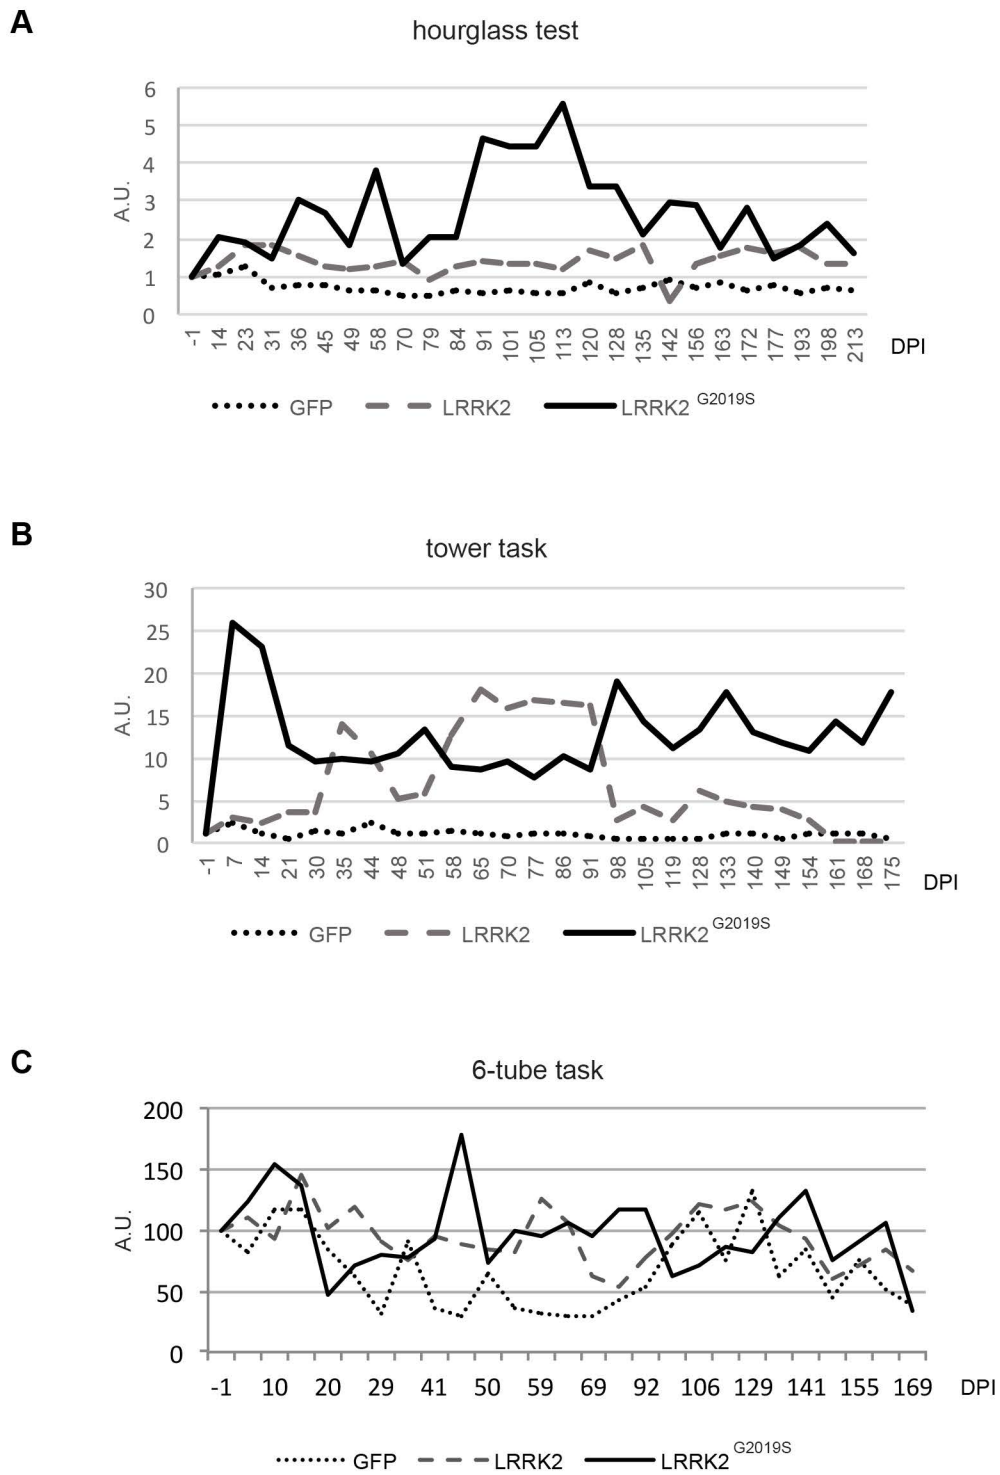

**Figure S4. Behavioral assays following GFP, LRRK2 and LRRK2<sup>G2019S</sup> expression**

**A.** Hourglass test (4 GFP, 4 LRRK2, and 8 LRRK2<sup>G2019S</sup> animals); **B.** Tower task (6 GFP, 4 LRRK2 and 8 LRRK2<sup>G2019S</sup> animals); and **C.** Six-tube task (2 GFP, 4 LRRK2 and 8 LRRK2<sup>G2019S</sup> animals).



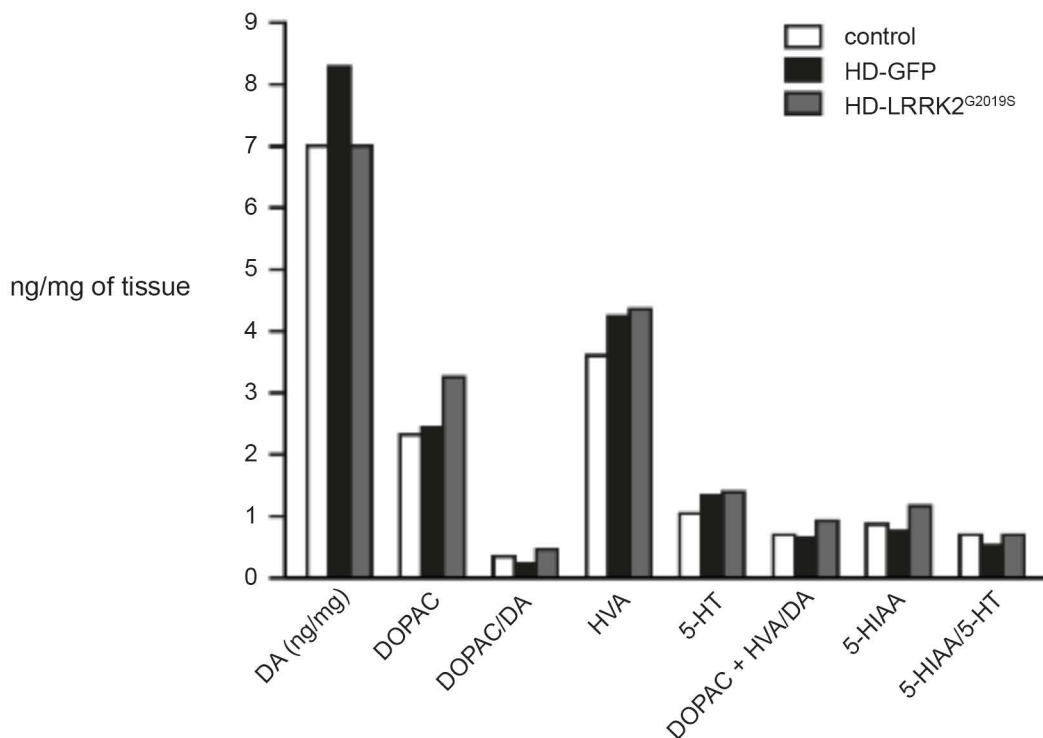

**Figure S5. Quantification of biogenic amines by HPLC**

HPLC with electrochemical detection was used to measure the concentration of the biogenic amines, dopamine (DA), 3,4- dihydroxyphenylacetic acid (DOPAC), homovanillic acid (HVA), 5-hydroxytryptamine (5-HT), and 5-hydroxyindoleacetic acid (5-HIAA). Samples were prepared from striatum of 4 naive animals, 4 HD-GFP and 4 HD-LRRK2G2019S. Tissue dosages of monoamines (DA, 5-HT) and their metabolites (DOPAC, HVA, 5-HIAA) were performed by an HPLC-ECD system\* with minor modification. The tissues were homogenized in 400  $\mu$ l of 0.1 N HClO<sub>4</sub> and centrifuged at 13,000 rpm for 30 min at 4 °C. Samples were injected using an S.I.L. 20AC autosampler (Schimadzu, Marne-la-Vallée, France) and injected into the HPLC column (Hypersil C18, 150 X 4.6 mm, 5  $\mu$ m; Cluzeau Info Labo, Sainte-Foy-La-Grande, France) protected by a Brownlee–NewGuard pre-column (RP-8, 15 x 3.2 mm, 7  $\mu$ m; Cluzeau Info Labo). The mobile phase, delivered at 1.2 ml/min flow rate using a HPLC pump (Gold 116, Beckman, France) was as follows (in mM): 60 NaH<sub>2</sub>PO<sub>4</sub>, 0.1 M disodium EDTA, and 2 octane sulfonic acid plus 7% methanol, adjusted to pH 3.9 with orthophosphoric acid and filtered through a 0.22  $\mu$ m Millipore filter. Detection of monoamines and their metabolites was performed with a coulometric detector (ESA Coulochem II) coupled to a dual-electrode analytic cell (model 5011). The potential of the electrodes was set at +350 and -270 mV. Output signals were analyzed using Jasco software (ChromNav, Lisses, France). Results are expressed as ng/mg of tissue.

\* Villaescusa JC et al. A PBX1 transcriptional network controls dopaminergic neuron development and is impaired in Parkinson's disease. *EMBO J.* 2016;1–16doi:10.15252/embj.201593725.

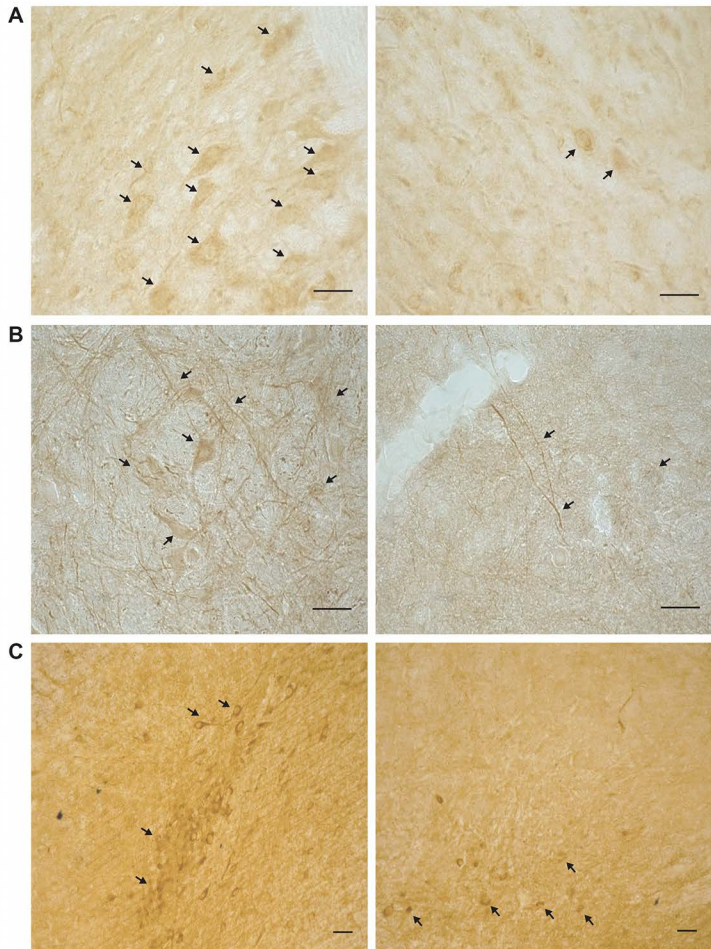

**Figure S6. LRRK2<sup>G2019S</sup> expression leads to increased  $\alpha$ -synuclein and phospho-tau immunoreactivity into the substantia nigra**

**A.** LRRK2 (leucine-rich repeat kinase 2) immunoreactivity (arrows) in nigral neurons; **B.**  $\alpha$ -synuclein<sup>PS129</sup> immunoreactivity (arrows); and **C.** phospho-tau<sup>Ser396</sup> immunoreactivity (arrows) from LRRK2<sup>G2019S</sup>-expressing animals. The left-hand column is the injected hemisphere and the right-hand column the contralateral hemisphere from animals killed 6 months post-injection ( $n = 3$  animals and  $\geq 3$  sections/animal). Scale bar = 40  $\mu$ m.
